# Supplementary material for: Conferring doorman characteristic and superior nano-scratch stability to graphene oxide membranes via tailoring channel microenvironment
Source: Royal Society of Chemistry journal article supplement (doi:10.1039/d2nj03270h), 2022-01-01
Supplement: d2nj03270h1.pdf [file d2nj03270h1.pdf]

## Supporting Information

### Conferring doorman characteristic and superior nano-scratch stability to graphene oxide membrane via tailoring channel microenvironment

Wenting Meng<sup>a</sup>, Nan Li<sup>a\*</sup>, Chunying Min<sup>b</sup>, Jie Shi<sup>a</sup>, Bo Zhu<sup>a</sup>, Liangsen Liu<sup>a</sup>, Shengkai Liu<sup>a</sup>,  
Ruiqi Shao<sup>a</sup>, Zhiwei Xu<sup>a\*</sup>, Zhijiang Cai<sup>a</sup>

<sup>a</sup>State Key Laboratory of Separation Membranes and Membrane Processes, School of Textile Science and Engineering, Tiangong University, Tianjin 300387, China

<sup>b</sup>Research School of Polymeric Materials, School of Materials Science & Engineering, Jiangsu University, Zhenjiang, Jiangsu 212013, China

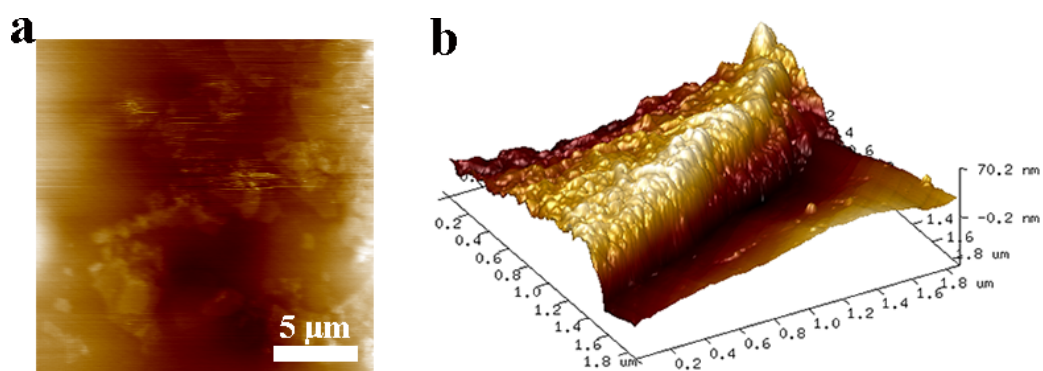

**Fig. S1.** (a) AFM image of GO nanosheets which drop on a mica substrate. (b) 3D AFM height image of functional layer.

---

Nan Li, E-mail: [linan@tiangong.edu.cn](mailto:linan@tiangong.edu.cn), Tel/Fax: +86 022 83955527

Zhiwei Xu, E-mail: [xuzhiwei@tiangong.edu.cn](mailto:xuzhiwei@tiangong.edu.cn), Tel/Fax: +86 022 83955231

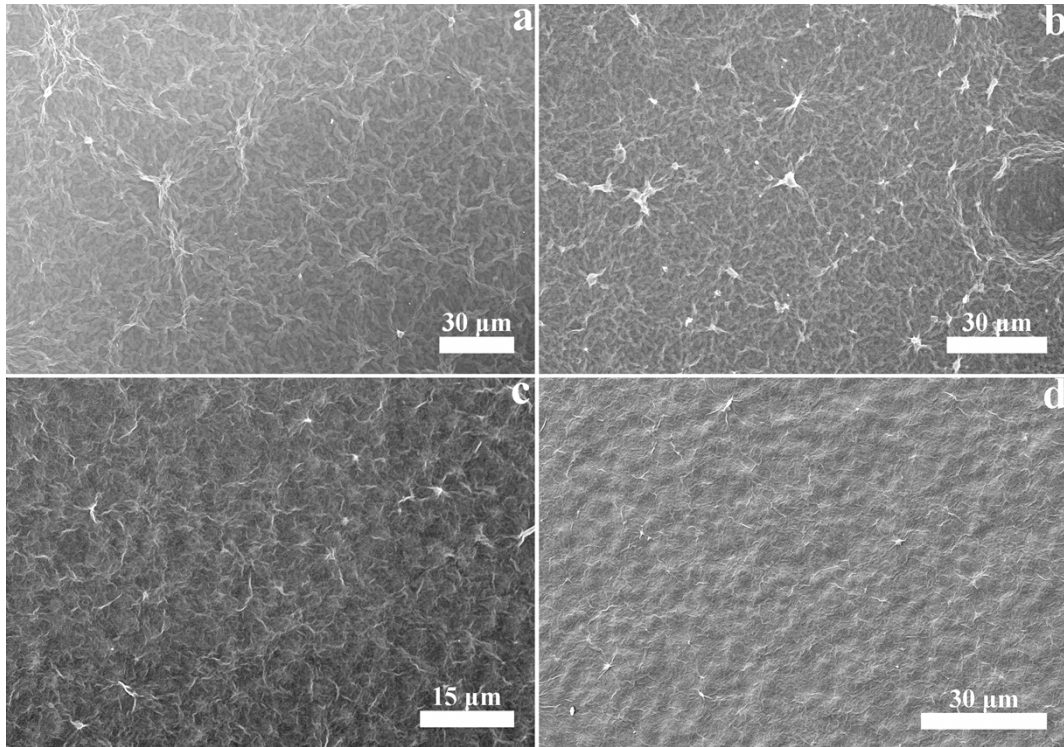

**Fig. S2.** SEM surface images of (a) GO, (b) GO-PEI-8, (c) GO-PEI-15 and (d) GO-PEI-30 membranes.

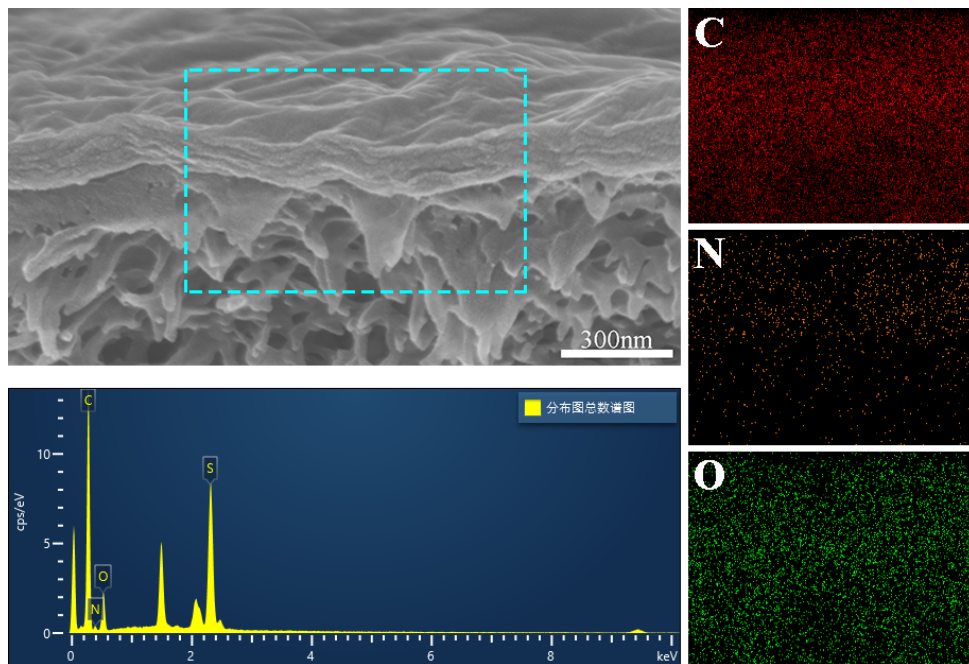

**Fig. S3.** EDS images of GO-PEI membrane.

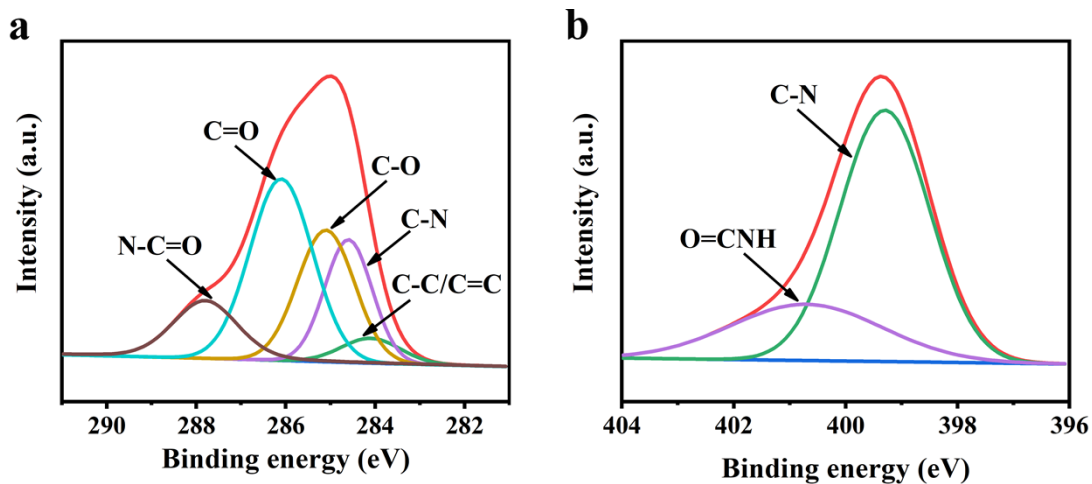

**Fig. S4.** XPS spectra of (a) C 1s and (b) N 1s spectra for GO-PEI-30 membrane.

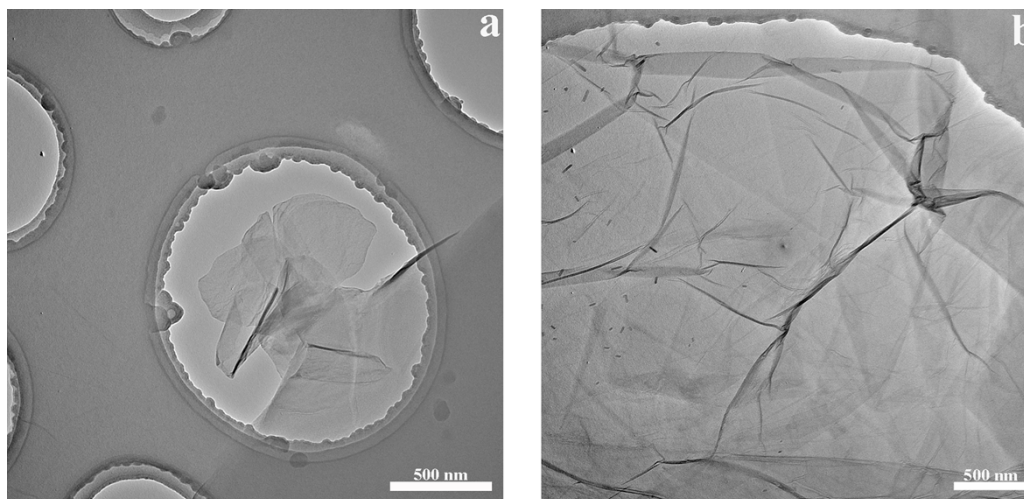

**Fig. S5.** TEM images of SGO and LGO nanosheets.

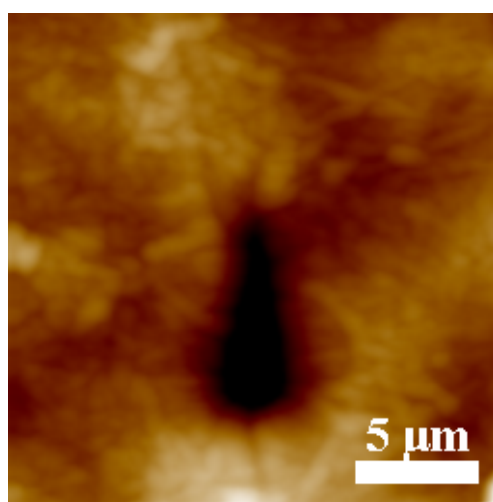

**Fig. S6.** AFM image of GO-PEI membrane after nano-scratch.

**Table S1. Permeance and rejection values of GO and GO-PEI membranes.**

| <b>Sample</b> | <b>Permeance</b> | <b>Rejection</b> |
|---------------|------------------|------------------|
| GO            | 20.36            | 98.54            |
| GO-PEI-8      | 56.07            | 96.94            |
| GO-PEI-10     | 65.82            | 95.77            |
| GO-PEI-15     | 67.21            | 90.37            |
| GO-PEI-30     | 54.19            | 94.90            |

**Table S2. Permeance and rejection values of GO and GO-PEI membranes at pH 2 and pH 12.**

| <b>Sample</b> | <b>Permeance</b> |              | <b>Rejection</b> |              |
|---------------|------------------|--------------|------------------|--------------|
|               | <b>pH 2</b>      | <b>pH 12</b> | <b>pH 2</b>      | <b>pH 12</b> |
| GO            | 15.20            | 18.15        | 99.81            | 99.12        |
| GO-PEI        | 58.31            | 54.63        | 98.37            | 86.79        |
